# Supplementary material for: Nanoscale friction on MoS2/graphene heterostructures
Source: Royal Society of Chemistry journal article supplement (doi:10.1039/d3nr00138e), 2023-01-01
Supplement: d3nr00138e1.pdf [file d3nr00138e1.pdf]

Supplemental Material

Nanoscale Friction on MoS<sub>2</sub>/graphene Heterostructures

Zhao Liu,<sup>†a</sup> Bartosz Szczefanowicz,<sup>a</sup> J. Marcelo J. Lopes,<sup>b</sup> Ziyang Gan,<sup>c</sup> Antony George,<sup>c</sup> Andrey Turchanin,<sup>c</sup> and Roland Bennewitz<sup>\*a</sup>

<sup>a</sup> *INM – Leibniz Institute for New Materials, Campus D22, 66123 Saarbrücken, Germany.*

<sup>b</sup> *Paul-Drude-Institute for Festkörperelektronik, Leibniz-Institut im Forschungsverbund Berlin e.V., Hausvogteiplatz 5-7, 10117 Berlin, Germany.*

<sup>c</sup> *Friedrich Schiller University Jena, Institute of Physical Chemistry, Lessingstr. 10, 07743 Jena, Germany.*

\* E-mail: roland.bennewitz@leibniz-inm.de

† *Present address: School of Materials Science and Engineering, Nankai University, 300350 Tianjin, China*

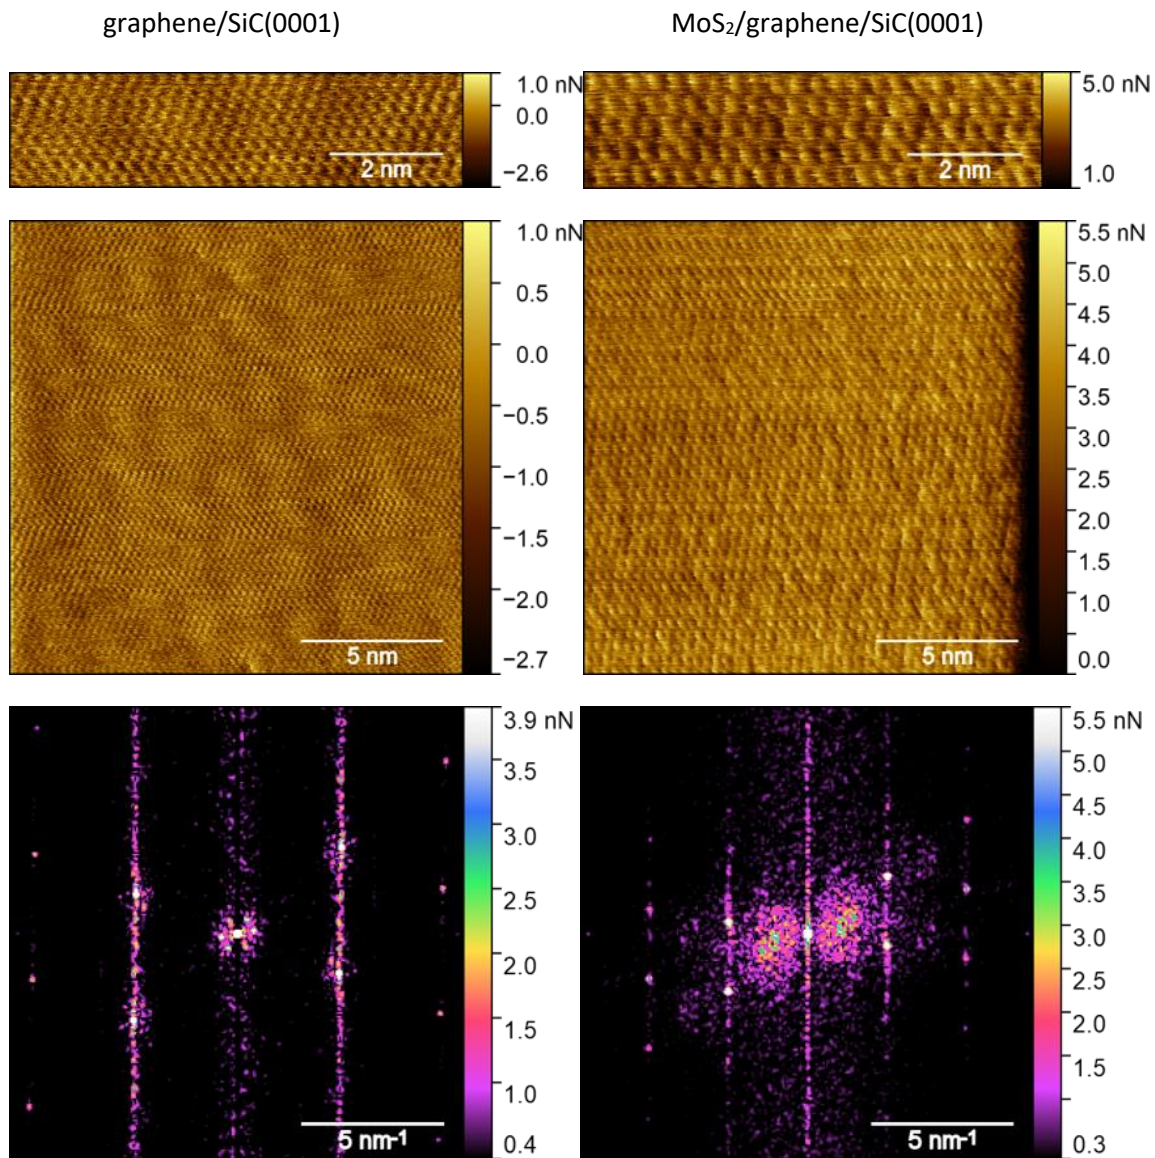

Friction force maps recorded on an area of epitaxial graphene/SiC(0001) without MoS<sub>2</sub> coverage and on a monolayer of MoS<sub>2</sub>/graphene/SiC(0001). a) High-resolution friction maps showing the atomic stick-slip pattern and the aligned orientation of MoS<sub>2</sub> and graphene. b) Overview friction maps revealing the well-known Moiré pattern on the epitaxial graphene/SiC(0001) surface and the weak and irregular Moiré structure which originates from the overlay of the underlying Moiré pattern and the lattice mismatch between graphene and MoS<sub>2</sub>. c) Fourier transformation of the friction maps in b). While the spatial frequency of the Moiré pattern for the epitaxial graphene/SiC(0001) is well distinguished, a broad distribution of shorter wave vectors is found for the MoS<sub>2</sub>/graphene/SiC(0001) island.
